# Supplementary material for: Crucial Involvement of IL-6 in Thrombus Resolution in Mice via Macrophage Recruitment and the Induction of Proteolytic Enzymes
Source: PubMed Central journal article supplement (PMC7019028; doi:10.3389/fimmu.2019.03150), 2020-02-07
Supplement: Data_Sheet_1.pdf [file Data_Sheet_1.pdf]

## Supplementary Material

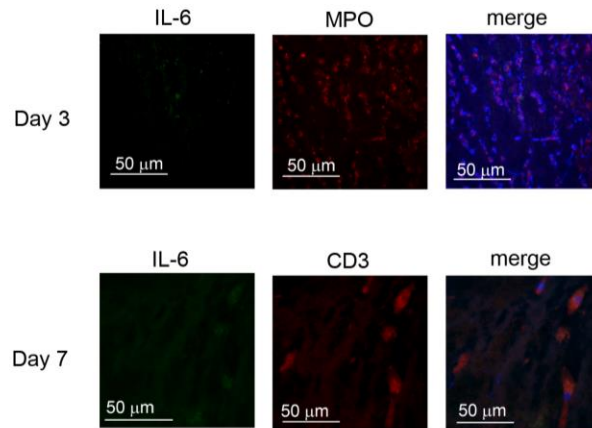

**Figure S1.** A double-color immunofluorescence analysis of IL-6-expressing cells in the thrombus. The samples were immunostained with the combination of anti-IL-6 and anti-MPO or anti-CD3. The fluorescent images were digitally merged in the right panel. Representative results from six independent experiments are shown here (original magnification,  $\times 400$ ; Blue, nuclear staining by DAPI).

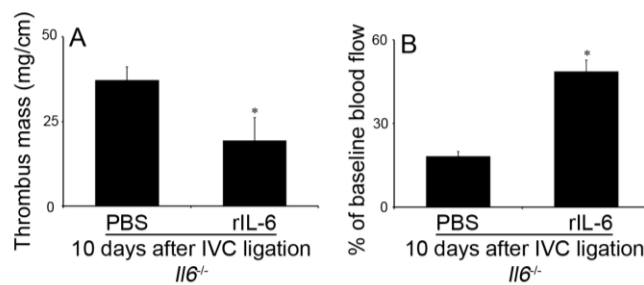

**Figure S2.** The effects of recombinant IL-6 (rIL-6) in *Il6*<sup>-/-</sup> mice on thrombus resolution. (A and B) *Il6*<sup>-/-</sup> mice were intraperitoneally administered with rIL-6 as described in Materials and Methods. Thrombus weights (A) and thrombosed blood flow (B) were measured at 10 days after IVC ligation. All values represent the mean  $\pm$  SEM (n=6 animals). \*,  $p < 0.05$ , vs. PBS.

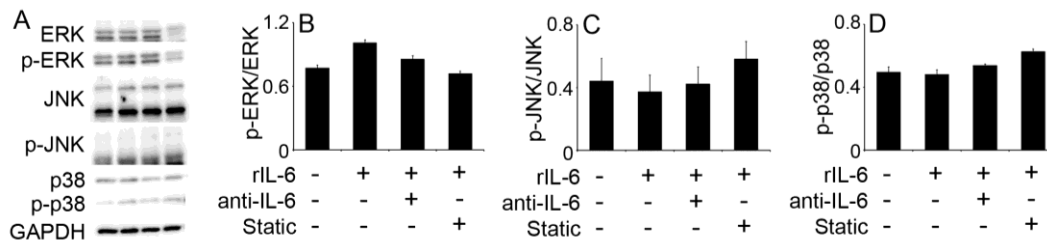

**Figure S3.** The effects of rIL-6 on MAPK signaling in macrophages. (A) Western blotting analysis using anti-GAPDH pAbs confirmed that an equal amount of protein was loaded onto each lane. Representative results from six independent experiments are shown here. (B-D) The ratios of p-ERK/ERK (B), p-JNK/JNK (C) and p-p38/p38 (D) were densitometrically determined and are shown. All values represent means  $\pm$  SEM (n=4 independent experiments).

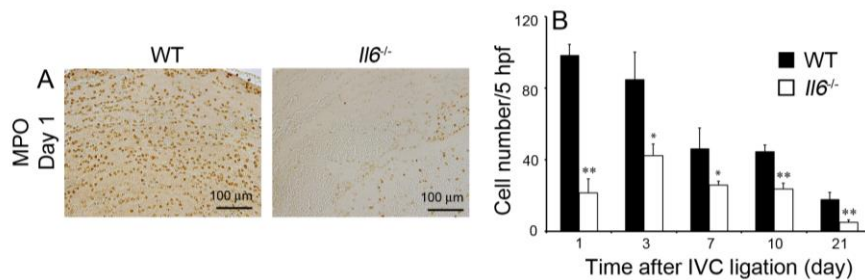

**Figure S4.** The effects of IL-6 deficiency on neutrophil infiltration in thrombus tissues. (A) Immunohistochemical analysis was performed using anti-myeloperoxidase (MPO) pAb at day 5 in venous thrombus samples from WT and *Il6*<sup>-/-</sup> mice (original magnification,  $\times 400$ ). Representative results from six independent experiments are shown here. (B) Neutrophil numbers were determined as described in Materials and Methods. All values represent the mean  $\pm$  SEM (n=6 animals).
